# Supplementary material for: Differentiation Therapy Targeting the β-Catenin/CBP Interaction in Pancreatic Cancer
Source: MDPI journal article supplement (doi:10.3390/cancers10040095), 2018-03-29
Supplement: s1 [file s1]

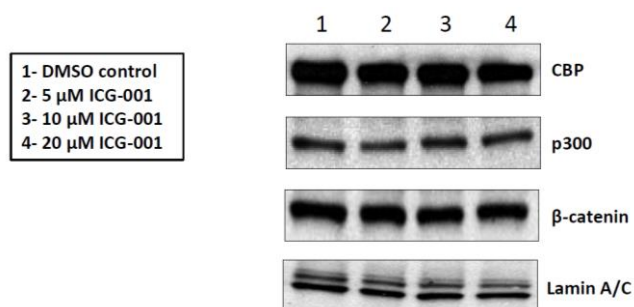

Figure S1. Total levels of CBP, p300, and  $\beta$ -catenin in PANC-1 cells treated with ICG-001 for 24 h. Treatment with ICG-001 does not change total nuclear  $\beta$ -catenin, CBP, and p300 levels.

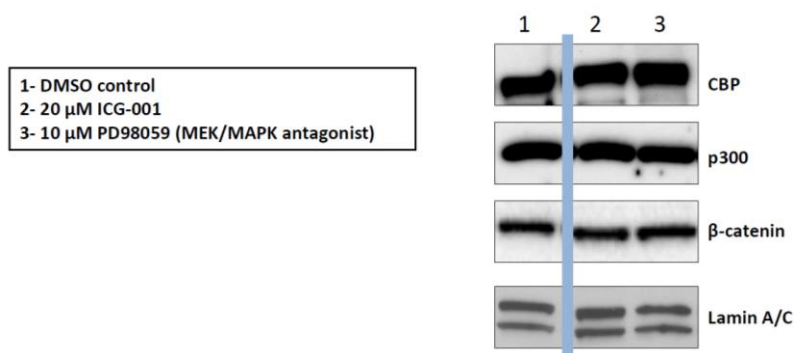

Figure S2. Total levels of CBP, p300, and  $\beta$ -catenin in PANC-1 cells treated with ICG-001 or PD98059 for 16 h. Treatment with ICG-001 or PD98059 does not change total nuclear  $\beta$ -catenin, CBP, and p300 levels. Blue dividing line indicates splice junction.
